# Supplementary material
Source: Royal Society of Chemistry journal article supplement (doi:10.1039/d6ay00418k)
Supplement: d6ay00418k1.pdf [file d6ay00418k1.pdf]

**Table S1.** Compositions, molar ratios, and room-temperature appearances of the NADESs.

| NADES composition    | No.        | Molar ratio | Appearance at room temperature |
|----------------------|------------|-------------|--------------------------------|
| ChCl-glycerol        | <i>1-a</i> | 2:1         | Solid                          |
|                      | <i>1-b</i> | 1:1         | Solid                          |
|                      | <i>1-c</i> | 1:2         | transparent liquid             |
| ChCl-ethylene glycol | <i>2-a</i> | 2:1         | Solid                          |
|                      | <i>2-b</i> | 1:1         | Solid                          |
|                      | <i>2-c</i> | 1:2         | transparent liquid             |
| ChCl-levulinic acid  | <i>3-a</i> | 2:1         | Solid                          |
|                      | <i>3-b</i> | 1:1         | Solid                          |
|                      | <i>3-c</i> | 1:2         | Pale-yellow liquid             |
| ChCl-DL-lactic acid  | <i>4-a</i> | 2:1         | Solid                          |
|                      | <i>4-b</i> | 1:1         | transparent liquid             |
|                      | <i>4-c</i> | 1:2         | transparent liquid             |

**Table S2.** Spiked concentrations ( $\mu\text{g/g}$ ) for 14 residual solvents in tea polyphenol using NMP and NADES as matrix media.

| analyte         | NMP  |     |    | NADES |      |     |
|-----------------|------|-----|----|-------|------|-----|
|                 | 1    | 2   | 3  | 4     | 5    | 6   |
| Methanol        | 5    | 10  | 20 | 2.5   | 5    | 10  |
| Ethanol         | 5    | 10  | 20 | 2.5   | 5    | 10  |
| Acetone         | 2    | 4   | 8  | 1     | 2    | 4   |
| Isopropanol     | 2.5  | 5   | 10 | 1.25  | 2.5  | 5   |
| Dichloromethane | 2    | 4   | 8  | 1     | 2    | 4   |
| n-Hexane        | 0.5  | 1   | 2  | 0.25  | 0.5  | 1   |
| Ethyl Acetate   | 1    | 2   | 4  | 0.5   | 1    | 2   |
| Chloroform      | 5    | 10  | 20 | 2.5   | 5    | 10  |
| Benzene         | 0.25 | 0.5 | 1  | 0.125 | 0.25 | 0.5 |
| n-Butanol       | 2.5  | 5   | 10 | 1.25  | 2.5  | 5   |
| Toluene         | 0.5  | 1   | 2  | 0.25  | 0.5  | 1   |
| Xylene          | 0.5  | 1   | 2  | 0.25  | 0.5  | 1   |
| Styrene         | 0.5  | 1   | 2  | 0.25  | 0.5  | 1   |
| Diethylbenzene  | 0.5  | 1   | 2  | 0.25  | 0.5  | 1   |

Levels 1-3: NMP matrix; levels 4-6: NADES matrix.

**Table S3.** Residual solvents in tea polyphenol products ( $\mu\text{g/g}$ ).

| Sample | Methanol | Ethanol | Acetone | Isopropanol | Dichloromethane | n-Hexane | Ethyl Acetate | Chloroform | Benzene | n-Butanol | Toluene | Xylene | Styrene | Diethylbenzene |
|--------|----------|---------|---------|-------------|-----------------|----------|---------------|------------|---------|-----------|---------|--------|---------|----------------|
| 1      | n.d.     | 4.10    | n.d.    | n.d.        | n.d.            | n.d.     | n.d.          | n.d.       | n.d.    | n.d.      | 3.70    | 9.60   | n.d.    | n.d.           |
| 2      | n.d.     | n.d.    | n.d.    | n.d.        | n.d.            | n.d.     | n.d.          | n.d.       | n.d.    | n.d.      | n.d.    | n.d.   | n.d.    | n.d.           |
| 3      | n.d.     | 2.30    | n.d.    | n.d.        | n.d.            | n.d.     | n.d.          | n.d.       | n.d.    | n.d.      | 2.10    | 2.00   | n.d.    | 4.00           |
| 4      | n.d.     | n.d.    | n.d.    | n.d.        | 110.50          | n.d.     | n.d.          | n.d.       | n.d.    | n.d.      | 2.30    | 9.30   | n.d.    | 8.40           |
| 5      | n.d.     | 4.70    | n.d.    | n.d.        | n.d.            | n.d.     | n.d.          | n.d.       | n.d.    | n.d.      | 3.90    | 2.60   | n.d.    | 7.10           |
| 6      | n.d.     | n.d.    | n.d.    | n.d.        | n.d.            | n.d.     | n.d.          | n.d.       | n.d.    | n.d.      | n.d.    | n.d.   | n.d.    | n.d.           |
| 7      | n.d.     | n.d.    | n.d.    | n.d.        | n.d.            | n.d.     | n.d.          | n.d.       | n.d.    | n.d.      | n.d.    | n.d.   | n.d.    | n.d.           |
| 8      | n.d.     | 3.80    | n.d.    | n.d.        | 107.30          | n.d.     | n.d.          | n.d.       | n.d.    | n.d.      | 2.10    | 9.40   | n.d.    | 7.30           |
| 9      | n.d.     | 2.30    | n.d.    | n.d.        | n.d.            | n.d.     | n.d.          | n.d.       | n.d.    | n.d.      | n.d.    | 10.60  | n.d.    | 7.60           |
| 10     | n.d.     | 4.20    | n.d.    | n.d.        | n.d.            | n.d.     | n.d.          | n.d.       | n.d.    | n.d.      | 2.50    | 9.40   | n.d.    | 7.80           |
| 11     | n.d.     | n.d.    | n.d.    | n.d.        | n.d.            | n.d.     | n.d.          | n.d.       | n.d.    | n.d.      | n.d.    | n.d.   | n.d.    | n.d.           |
| 12     | n.d.     | n.d.    | n.d.    | n.d.        | n.d.            | n.d.     | n.d.          | n.d.       | n.d.    | n.d.      | n.d.    | 11.00  | 21.30   | 7.10           |
| 13     | n.d.     | n.d.    | n.d.    | n.d.        | n.d.            | n.d.     | n.d.          | n.d.       | n.d.    | n.d.      | n.d.    | n.d.   | n.d.    | n.d.           |
| 14     | n.d.     | n.d.    | n.d.    | n.d.        | n.d.            | n.d.     | n.d.          | n.d.       | n.d.    | n.d.      | n.d.    | n.d.   | n.d.    | n.d.           |
| 15     | n.d.     | n.d.    | n.d.    | n.d.        | n.d.            | n.d.     | n.d.          | n.d.       | n.d.    | n.d.      | n.d.    | n.d.   | n.d.    | n.d.           |
| 16     | 123.00   | n.d.    | n.d.    | n.d.        | n.d.            | n.d.     | n.d.          | n.d.       | n.d.    | n.d.      | n.d.    | n.d.   | n.d.    | n.d.           |
| 17     | n.d.     | n.d.    | n.d.    | n.d.        | n.d.            | n.d.     | n.d.          | n.d.       | n.d.    | n.d.      | n.d.    | n.d.   | n.d.    | 3.60           |
| 18     | n.d.     | 4.30    | n.d.    | n.d.        | n.d.            | n.d.     | n.d.          | n.d.       | 12.70   | n.d.      | 2.60    | 9.20   | n.d.    | 8.70           |
| 19     | n.d.     | 3.70    | n.d.    | n.d.        | n.d.            | n.d.     | n.d.          | n.d.       | n.d.    | n.d.      | 3.10    | 13.60  | n.d.    | 5.50           |
| 20     | 188.90   | 26.73   | n.d.    | n.d.        | 18.38           | n.d.     | n.d.          | n.d.       | n.d.    | n.d.      | n.d.    | n.d.   | n.d.    | 2.18           |
| 21     | 151.54   | 134.34  | 7.83    | n.d.        | n.d.            | n.d.     | n.d.          | n.d.       | n.d.    | n.d.      | n.d.    | n.d.   | n.d.    | n.d.           |
| 22     | n.d.     | 12.42   | 7.38    | n.d.        | n.d.            | n.d.     | n.d.          | n.d.       | n.d.    | n.d.      | n.d.    | n.d.   | n.d.    | n.d.           |
| 23     | 69.41    | 11.97   | 6.55    | n.d.        | 6.14            | n.d.     | n.d.          | n.d.       | n.d.    | n.d.      | n.d.    | n.d.   | n.d.    | n.d.           |
| 24     | n.d.     | n.d.    | n.d.    | n.d.        | n.d.            | n.d.     | n.d.          | n.d.       | n.d.    | n.d.      | n.d.    | n.d.   | n.d.    | n.d.           |
| 25     | 27.16    | 12.60   | 5.64    | n.d.        | n.d.            | n.d.     | n.d.          | n.d.       | n.d.    | n.d.      | n.d.    | n.d.   | n.d.    | n.d.           |
| 26     | 28.44    | 14.52   | 5.75    | n.d.        | n.d.            | n.d.     | n.d.          | n.d.       | n.d.    | n.d.      | n.d.    | n.d.   | n.d.    | n.d.           |
| 27     | 54.31    | 19.04   | n.d.    | n.d.        | n.d.            | n.d.     | 3.36          | n.d.       | n.d.    | n.d.      | n.d.    | n.d.   | n.d.    | n.d.           |
| 28     | 9.89     | 41.70   | 5.27    | n.d.        | n.d.            | n.d.     | n.d.          | n.d.       | n.d.    | n.d.      | n.d.    | n.d.   | n.d.    | n.d.           |
| 29     | 20.83    | 15.60   | 5.60    | n.d.        | n.d.            | n.d.     | n.d.          | n.d.       | n.d.    | n.d.      | n.d.    | n.d.   | n.d.    | n.d.           |
| 30     | 142.33   | 36.66   | 8.17    | n.d.        | 5.63            | n.d.     | 3.33          | n.d.       | n.d.    | n.d.      | n.d.    | 2.05   | n.d.    | 1.13           |
| 31     | 12.29    | 11.27   | 5.36    | n.d.        | n.d.            | n.d.     | n.d.          | n.d.       | n.d.    | n.d.      | n.d.    | n.d.   | n.d.    | n.d.           |
| 32     | 205.88   | 230.61  | 10.04   | n.d.        | n.d.            | n.d.     | 11.92         | n.d.       | n.d.    | n.d.      | n.d.    | 2.18   | n.d.    | n.d.           |
| 33     | 215.36   | 311.22  | 10.81   | n.d.        | n.d.            | n.d.     | 13.44         | n.d.       | n.d.    | n.d.      | n.d.    | 2.29   | n.d.    | n.d.           |
| 34     | 209.84   | 280.68  | 10.13   | n.d.        | n.d.            | n.d.     | 12.65         | n.d.       | n.d.    | n.d.      | n.d.    | 2.25   | n.d.    | n.d.           |
| 35     | 222.61   | 177.62  | 10.33   | n.d.        | n.d.            | n.d.     | 13.05         | n.d.       | n.d.    | n.d.      | n.d.    | 2.00   | n.d.    | n.d.           |

|    |        |        |       |      |      |      |       |      |      |      |      |      |      |      |
|----|--------|--------|-------|------|------|------|-------|------|------|------|------|------|------|------|
| 36 | 162.99 | 12.68  | 10.13 | n.d. | n.d. | n.d. | 3.69  | n.d. | n.d. | n.d. | n.d. | 2.53 | n.d. | n.d. |
| 37 | 25.94  | 31.52  | 5.71  | n.d. | n.d. | n.d. | 4.58  | n.d. |
| 38 | 64.92  | 12.18  | 5.94  | n.d. | n.d. | n.d. | 7.40  | n.d. | n.d. | n.d. | n.d. | 1.53 | n.d. | n.d. |
| 39 | 224.78 | 230.49 | 10.14 | n.d. | n.d. | n.d. | 12.14 | n.d. | n.d. | n.d. | n.d. | 2.03 | n.d. | n.d. |
| 40 | 194.35 | 250.04 | 9.22  | n.d. | n.d. | n.d. | 11.24 | n.d. | n.d. | n.d. | n.d. | 2.09 | n.d. | n.d. |
| 41 | 209.92 | 256.50 | 9.32  | n.d. | n.d. | n.d. | 11.39 | n.d. | n.d. | n.d. | n.d. | 2.12 | n.d. | n.d. |

n.d.: not detected.
